# Supplementary material
Source: PubMed Central journal article supplement (PMC4636733)

# Adaptive evolution of drug targets in producer and non-producer organisms

Bjarne G. Hansen, Xin E. Sun, Hans J. Genee, Christian S. Kaas, Jakob B. Nielsen,  
Uffe H. Mortensen, Jens C. Frisvad and Lizbeth Hedstrom

## Supporting Information

**Table S1. Sequences generated in this study.** a) MPA production on CYA media. – means no production, + medium and ++ high production (Frisvad and Samson, 2004)). b) The extracted *imdA* and *imdB* sequence parts for these organisms do not overlap and are therefore not included in Figure 5 B.

| Taxon name                             | IBT number | Other collection numbers | MPA prod <sup>a</sup> | DNA sequences (GenBank accession #) |          |                  |
|----------------------------------------|------------|--------------------------|-----------------------|-------------------------------------|----------|------------------|
|                                        |            |                          |                       | IMPDH-A                             | IMPDH-B  | <i>β-tubulin</i> |
| <i>P. allii</i> <sup>a</sup>           | 20212      | CBS 875.95               | –                     | JN112053                            | JN112066 | JN112035         |
| <i>P. albocoremium</i> <sup>b</sup>    | 21596      | -                        | –                     | JN112054                            | JN112065 | JN112036         |
| <i>P. aurantiogriseum</i> <sup>b</sup> | 11325      | CBS 792.95               | –                     | JN112050                            | JN112062 | JN112033         |
| <i>P. brevicompactum</i> <sup>b</sup>  | 18329      | CBS 110067               | ++                    | JN112046                            | JN112068 | JN112040         |
| <i>P. caseifulvum</i> <sup>a</sup>     | 19782      | CBS 108956               | –                     | JN112051                            | JN112067 | JN112037         |
| <i>P. crustosum</i>                    | 21518      | CBS 101025               | –                     | JN112048                            | JN112061 | JN112030         |
| <i>P. cyclopium</i> <sup>b</sup>       | 16769      | CBS 110337               | –                     | JN112049                            | JN112063 | JN112034         |
| <i>P. echinulatum</i> <sup>b</sup>     | 21839      | CBS 112286               | –                     | JN112052                            | JN112064 | JN112032         |
| <i>P. roqueforti</i>                   | 14756      | -                        | +                     | JN112045                            | JN112058 | JN112039         |
| <i>P. roqueforti</i> <sup>b</sup>      | 24748      | -                        | –                     | JN112044                            | JN112059 | JN112038         |
| <i>P. viridicatum</i>                  | 21551      | CBS 101034               | –                     | JN112047                            | JN112060 | JN112031         |

**Table S2. PCR primers**

| Primer     | Sequence (5' to 3') <sup>a</sup>       |
|------------|----------------------------------------|
| BGHA358    | AGGCCAGCUCGTGAAAGCCTTCCGTGGTATG        |
| BGHA359    | AGCTGGCCUTC GTTGCTGACAAAGTACTC         |
| BGHA360    | AGGTCAGCUGGTCAAGGCCTACCGCGGTATG        |
| BGHA361    | AGCTGACCUTCATTGCTAACGTAGTACTC          |
| BGHA430    | AAGCCGATGUAACCGGGCAGGATCAGGA           |
| BGHA431    | ACATCGGCTUCCCCGCTTCCGATGTCTCATTG       |
| BGHA432    | AGGGTTCCGTTUCAGTGACAGGGAAGCCACCGAAG    |
| BGHA433    | AGAACGGAACCCUTAAGTCCAAGCTCGTTGGA       |
| BGHA434    | AAGGTGAUAGAACCGGGCAAATCAGGA            |
| BGHA435    | ATCACCTUCCCGGCATCGGATGTTTCGT           |
| BGHA436    | AGGGTTCCCTTTUCGGTCACCGGGAACCCGCCGA     |
| BGHA437    | AAAAGGGAACCCUCCTCTCGAAGCTTCTCGGA       |
| BGHA454    | ACGGAAGGCCUTGACGAGCTGGCCCTCGTTG        |
| BGHA455    | ATTGGGGTGGCCTCUCTCATGAGCACTGAAGTTCTTTC |
| BGHA505    | AGCCGATGUAGCCGGGCAAGATCAGGA            |
| BGHA506    | ACATCGGCUTCCTGCCTCCGATGTGT             |
| BGHA507    | AGTTCGCTUCTCAGTGACAGGGAAACCTCC         |
| BGHA508    | AACGGAACUCTTCGCTCCAAGCTCGTT            |
| BGHA509    | AACCGATAUATCCCGGAAGAATGAGGAA           |
| BGHA510    | ATATCGGTUTTCCTGCTTCCGATGTTAC           |
| BGHA511    | ATTTTCAGUA ACTGGGAAGCCGCCGAA           |
| BGHA512    | ACTGAAA AUGGA ACTCTCCGCTCAAAG          |
| BGHA527    | ATATGGCUGCCGCGCGGCACC                  |
| BGHA528    | AGATCCGGCUGCTAACA                      |
| BGHA529    | AGCCATAUGGT CGAAATCCTGGACTA            |
| BGHA530    | AGCCGGATCUAAGAAGAGTACA ACTTCTTCTCG     |
| BGHA539    | AGCCATAUGCCTATCACCGCCAGCGAC            |
| BGHA540    | AGCCGGATCUACGCGTAAAGCTTCTTGTCG         |
| BGHA541    | AGCCATAUGGT CGAAGTTCTGGATTATAC         |
| BGHA542    | AGCCGGATCUAAGAGTACA ACTTCTTCTC         |
| BGHA543    | AGCCATAUGCCTATCACCGCCGGCGAC            |
| BGHA544    | AGCCGGATCUACGAGTAAAGCTTCTTGTC          |
| BGHA545    | AGCCATAUGCCAATTGCCAACGGTGAC            |
| BGHA546    | AGCCGGATCUAAGAGTAGAGCTTCTTGTC          |
| BGHA667    | ACGGTTCGGUTGTTACACCGGTGTGCA            |
| BGHA668    | ACGGAACCGUTC GCTTTGAAATGCGCAG          |
| BGHA669    | ACCTGGCCGUTGTCGACACCAGCGTGCA           |
| BGHA670    | ACGGCCAGGUTC GCTTTGAGATGAGAAG          |
| BGHA236HC  | ATGCC IATYNCCRMCGGIGAYKC               |
| BGHA246HC  | CRGCCTTCTTRTCTCCATGG                   |
| BGHA531    | AGCTTCTTGTCGTAGCTGTG                   |
| BGHA532    | GTCAAGGGTCTSGCYATGG                    |
| BGHA240 HC | ATGGT CGADR TYCWGGAYTAYACC             |
| BGHA241 HC | GARGCRCCRGCGTTMTTG                     |
| BGHA343    | GAGCGYATGARYGTYTAYTTCA                 |
| BGHA344    | GTGAACTCCATCTCRTCCATACC                |

**Table S3. *E. coli* expression constructs and cloning strategy.** <sup>a</sup>Underlined sequence will be removed and lead to single stranded overhang during USER cloning.

| Construct | Expressed enzyme                                                                                        | Primers for IMPDH amplification                                                                                       |         |         |
|-----------|---------------------------------------------------------------------------------------------------------|-----------------------------------------------------------------------------------------------------------------------|---------|---------|
|           |                                                                                                         | Exon 1                                                                                                                | Exon 2  | Exon 3  |
| P113      | <i>P. brevicompactum</i> IMPDH-A                                                                        | 539/505                                                                                                               | 506/507 | 508/540 |
| P114      | <i>P. brevicompactum</i> IMPDH-B                                                                        | Amplified from cDNA with 529/530                                                                                      |         |         |
| P115      | <i>A. nidulans</i> lmdA                                                                                 | 545/509                                                                                                               | 510/511 | 512/546 |
| P116      | <i>P. chrysogenum</i> IMPDH-A                                                                           | 543/430                                                                                                               | 431/432 | 433/544 |
| P117      | <i>P. chrysogenum</i> IMPDH-B                                                                           | 541/434                                                                                                               | 435/436 | 437/542 |
| P118      | <i>P. brevicompactum</i> IMPDH-A with Y411F                                                             | 539/455 and 540/454 and P113 as PCR template                                                                          |         |         |
| P119      | <i>P. brevicompactum</i> IMPDH-B with F411Y                                                             | 529/361 and 530/360 and P114 as PCR template                                                                          |         |         |
| P120      | <i>A. nidulans</i> lmdA with Y411F                                                                      | 545/359 and 546/358 and P115 as PCR template                                                                          |         |         |
| P135      | Chimeric IMPDH of <i>P. brevicompactum</i> IMPDH-B (N-term) and <i>P. brevicompactum</i> IMPDH-A C-term | <i>P. brevicompactum</i> IMPDH-B and lmdA fragments amplified with primer-pairs 529/667 and 668/540, respectively.    |         |         |
| P136      | <i>P. brevicompactum</i> IMPDH-B with F411Y and IMPDH-A C-term                                          | Same as for P135 but using P119 as PCR template for IMPDH-B fragment                                                  |         |         |
| P137      | Chimeric IMPDH of <i>P. brevicompactum</i> IMPDH-A (N-term) and <i>P. brevicompactum</i> IMPDH-B C-term | <i>P. brevicompactum</i> IMPDH-A and IMPDH-B fragments amplified with primer-pairs 539/669 and 670/530, respectively. |         |         |
| P138      | <i>P. brevicompactum</i> IMPDH-A with Y411F and with IMPDH-B C-term                                     | Same as for P137 but using P118 as PCR template for IMPDH-A fragment                                                  |         |         |

**Table S4. Concentrations of IMP, NAD<sup>+</sup> used for determination of IC<sub>50</sub> (MPA)**

| <u>Enzyme</u>          | <u>IMP (mM)</u> | <u>NAD<sup>+</sup> (mM)</u> |
|------------------------|-----------------|-----------------------------|
| <i>AnImdA</i>          | 0.5             | 0.5                         |
| <i>PbIMPDH-A</i>       | 3               | 1                           |
| <i>PbIMPDH-B</i>       | 3               | 1                           |
| <i>PcIMPDH-A</i>       | 1               | 1                           |
| <i>PcIMPDH-B</i>       | 1               | 1                           |
| <u>Mutant proteins</u> | <u>1</u>        | <u>1</u>                    |

**Table S5. Putative genes flanking the MPA cluster in *P. brevicompactum*.**

Further comparison of the regions further away from the MPA cluster in *P. brevicompactum* reveal other genes homologous to genes from *P. chrysogenum* however, they are located in loci of many different contigs.

| Gene                        | Region on<br><i>P. brevicompactum</i><br>contig<br>(Pb BAC 1E13+1C23)* | Size<br>(aa) | BLASTx homolog                                                                            | Predicted function                          | E-value               | Identity<br>(%) |
|-----------------------------|------------------------------------------------------------------------|--------------|-------------------------------------------------------------------------------------------|---------------------------------------------|-----------------------|-----------------|
| orf1                        | 0 -                                                                    | 4139         | 987 <i>P. chrysogenum</i> , Pc22g22260                                                    | C2H2 finger domain protein                  | 0                     | 87              |
| orf2                        | 4513 -                                                                 | 5736         | 407 <i>P. chrysogenum</i> , Pc22g22270                                                    | DNA mismatch repair protein                 | 1.15E-151             | 76              |
| orf3                        | 7554 -                                                                 | 9212         | 514 <i>P. chrysogenum</i> , Pc22g22280                                                    | WD repeat protein                           | 0                     | 94              |
| orf4                        | 10249 -                                                                | 10913        | 191 <i>P. chrysogenum</i> , Pc22g22290                                                    | IgE-binding protein                         | 5.97E-75              | 82              |
| orf5                        | 12809 -                                                                | 1399         | 360 <i>Neosartorya fischeri</i> , XP_001265454<br><i>P. chrysogenum</i> , Pc22g22320      | nucleoside diphosphatase                    | 1.42E-113<br>1.37E-93 | 71<br>72        |
| MPA cluster (17830 – 43315) |                                                                        |              |                                                                                           |                                             |                       |                 |
| orf13                       | 50594 -                                                                | 51894        | 368 <i>P. chrysogenum</i> , Pc21g04710                                                    | phospho-2-dehydro-3-deoxyheptonate aldolase | 0                     | 94              |
| orf14                       | 52993 -                                                                | 53878        | 256 <i>P. chrysogenum</i> , Pc21g04720                                                    | unknown                                     | 4.00E-91              | 72              |
| orf15                       | 54299 -                                                                | 55162        | 251 <i>P. chrysogenum</i> , Pc21g04730                                                    | unknown                                     | 1.61E-63              | 60              |
| orf16                       | 55381 -                                                                | 56121        | 246 <i>Aspergillus fumigatus</i> ,<br>XP_001481519<br>(no hits in <i>P. chrysogenum</i> ) | glycosidase hydrolase                       | 1.00E-61              | 57              |
| orf17                       | 57170 -                                                                | 59032        | 597 <i>P. chrysogenum</i> , Pc21g04750                                                    | C6 transcription factor                     | 0                     | 81              |
| orf18                       | 60261 -                                                                | 62432        | 539 <i>P. chrysogenum</i> , Pc21g04770                                                    | NADH-cytochrome B5 reductase                | 6.63E-115             | 76              |
| orf19                       | 63597 -                                                                | 65642        | 625 <i>P. chrysogenum</i> , Pc21g04800                                                    | unknown                                     | 0                     | 73              |
| orf20                       | 67638 -                                                                | 68559        | 286 <i>P. chrysogenum</i> , Pc12g02580                                                    | unknown                                     | 3.54E-44              | 62              |
| orf21                       | 68851 -                                                                | 72867        | 1255 <i>P. chrysogenum</i> , Pc12g02550                                                   | myosin protein                              | 0                     | 93              |
| orf22                       | 74083 -                                                                | 79557        | 1181 <i>P. chrysogenum</i> , Pc22g21120                                                   | carboxypeptidase                            | 0                     | 79              |
| orf23                       | 79786 -                                                                | 82071        | 689 <i>P. chrysogenum</i> , Pc12g02500                                                    | arginine permease                           | 0                     | 85              |
| orf24                       | 84043 -                                                                | 85074        | 293 <i>Aspergillus niger</i> , XP_001391260<br>(no hits in <i>P. chrysogenum</i> )        | phytanoyl-CoA dioxygenase                   | 3.30E-130             | 74              |
| orf25                       | 85889 -                                                                | 91912        | 1907 <i>Aspergillus terreus</i> , XP_001209574<br><i>P. chrysogenum</i> , Pc21g03870      | unknown                                     | 0<br>9.85E-142        | 37<br>27        |
| orf26                       | 93143 -                                                                | 100908       | 2119 <i>Penicillium marneffei</i> ,<br>XP_002147174<br><i>P. chrysogenum</i> , Pc22g14540 | beta-galactosidase                          | 0                     | 74<br>38        |
| orf27                       | 101641                                                                 | 103365       | 574 <i>P. chrysogenum</i> , Pc21g21450                                                    | unknown                                     | 0                     | 61              |

**Figure S1.** Detailed graphical representation showing principle of PCR based USER cloning of a gene of interest (GOI) into pET28a. A pET28a USER compatible vector fragment, pET28aU, is made by PCR amplification using uracil containing primers (527 and 528) followed by DpnI treatment to remove PCR template. Likewise, the GOI fragment to be inserted into pET28aU is amplified with primers containing uracil. The primer tails were designed to allow seamless USER fusion and the uracil in the 5'-end of the GOI fragment corresponds to the T of the start-codon (ATG) of the GOI; and the uracil in 3'-end of the GOI fragment is complementary to the second nucleotide in the stop codon (TAG) of pET28a. USER fusion of the GOI PCR fragment and pET28aU is performed by mixing the two fragments followed by USER enzyme treatment to remove uracil residues. This step generates ends with single stranded DNA overhangs that allow for orderly fusion of the fragments. Following USER treatment the cloning mix is transformed into *E. coli*.

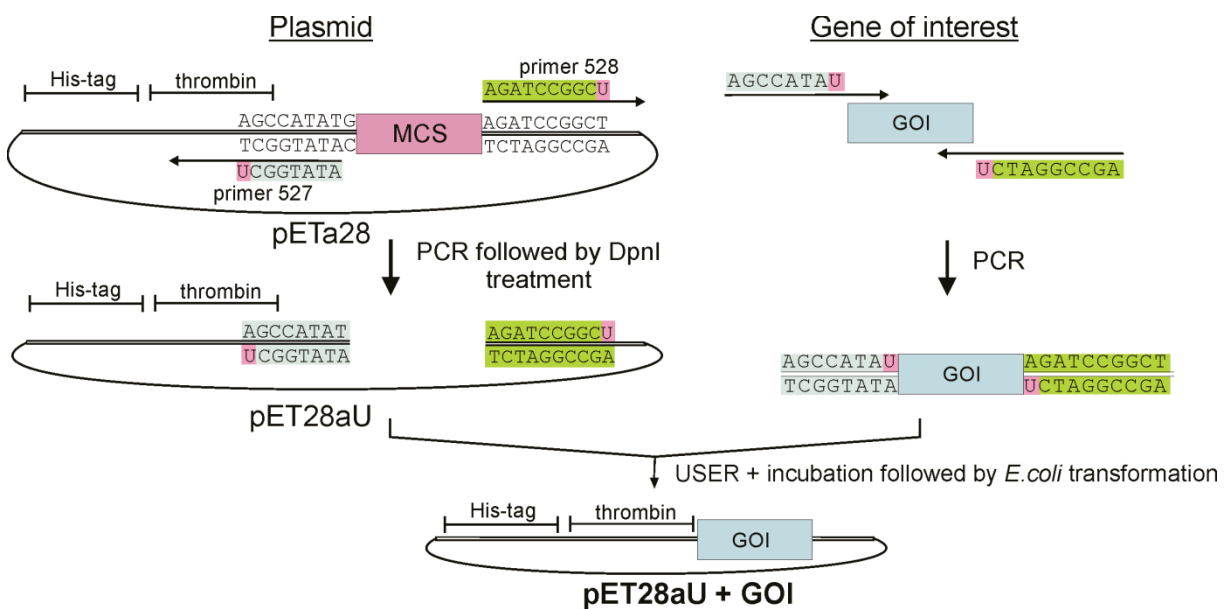

**Figure S2. SDS-PAGE of purified recombinant fungal proteins.** Lanes are as marked. All enzymes were purified to >90% purity with the exception of *Pc*IMPDH-B, which was partially purified to ~45% purity due to poor stability. Note that the lower molecular weight bands in the *Pc*IMPDH-B sample are also IMPDH as demonstrated by Western blot analysis. The concentrations of all enzymes were verified by titration with MPA as described in the manuscript. This proteolysis could not be prevented with the addition of protease inhibitor cocktails to the lysate. P135 = *Pb*IMPDH-B with *Pb*IMPDH-A C-terminus, P136 = *Pb*IMPDH-B with *Pb*IMPDH-A C-terminus + F411Y mutation, P137 = *Pb*IMPDH-A with *Pb*IMPDH-B C-terminus, P138 = *Pb*IMPDH-A with *Pb*IMPDH-B C-terminus + Y411F mutation.

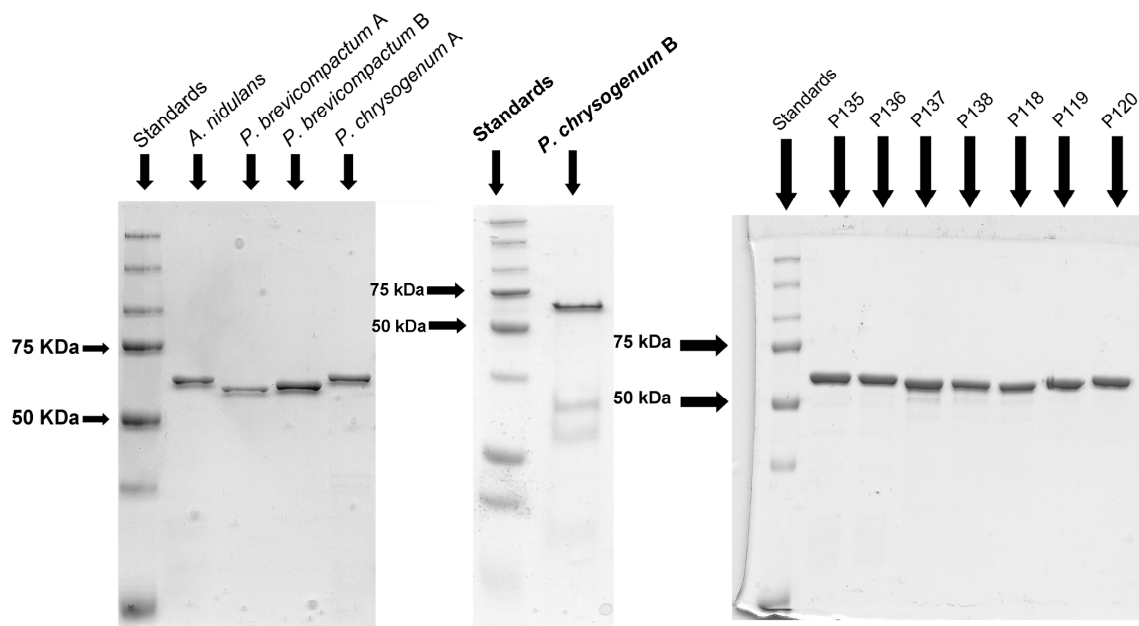

**Figure S3.** Determination of IMPDH oligomeric state using gel filtration chromatography on a S200 Sephacryl column. *AnImdA* (dotted line) elutes at 39.3 ml, *PbIMPDH-A* (solid line) elutes at 39.2 ml, and *PbIMPDH-B* (dashed line) elutes at 39.0 ml. All three proteins elute at ~ 220 kDa, consistent with being tetramers. The elution volume of the standards are as follows: blue dextran: 36 ml, thyroglobulin: 670 kDa, 36.2 ml, bovine gamma-globulin: 158 kDa, 44 ml, chicken ovalbumin: 44 kDa, 56.9 ml, equine myoglobin: 17 kDa, 71.8 ml, and vitamin B12: 1.35 kDa, 117 ml.

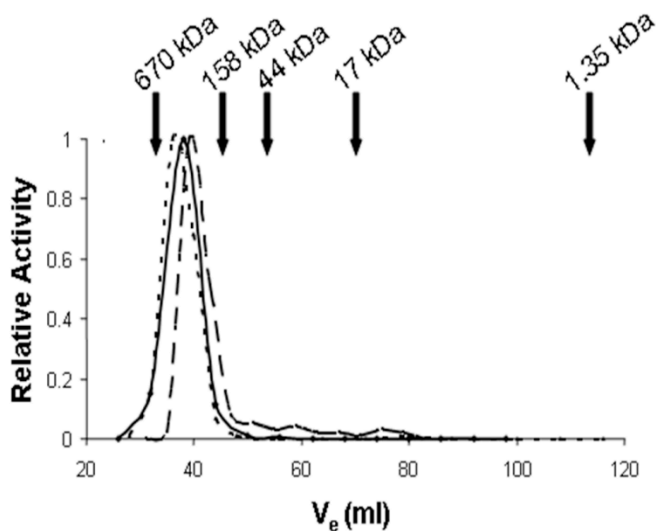



**Figure S4.** Rooted cladogram based on  $\beta$ -tubulin cDNA sequences (950 bp) from 14 species from *Penicillium* subgenus *Penicillium* and two filamentous fungi outside. *P.*: *Penicillium* and *A.*: *Aspergillus*. MPA production is indicated by “+” or “-“. The gray line indicates organisms where both IMPDH-A and IMPDH-B genes have been detected. Bootstrap values (expressed as percentage of 1000 replications) are shown at the branch points, and the scale represents changes per unit. *Coccidioides immitis* has been used as outgroup.

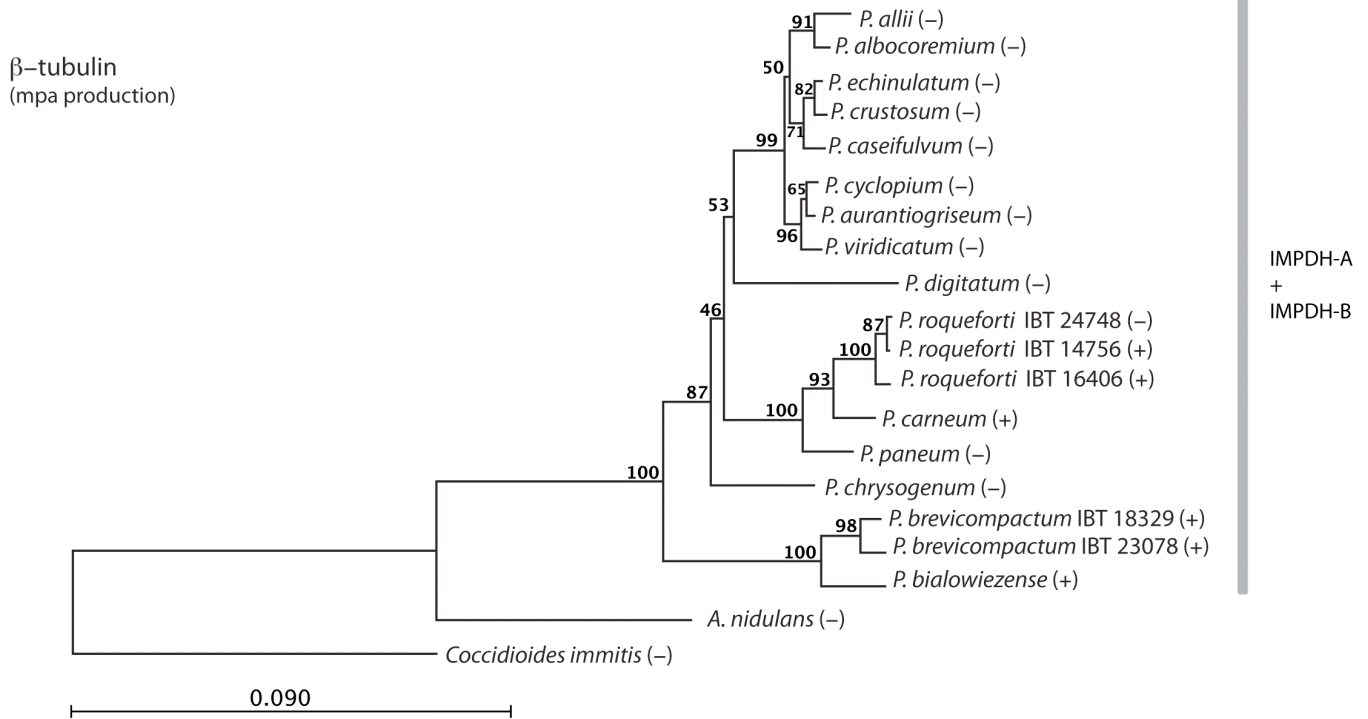

Supplement: NIHMS732172-supplement-Supporting.pdf [file NIHMS732172-supplement-Supporting.pdf]
